# Supplementary material for: Recovery of Bioactive Compounds from Industrial Exhausted Olive Pomace through Ultrasound-Assisted Extraction
Source: MDPI journal article supplement (doi:10.3390/biology10060514), 2021-06-10
Supplement: s1 [file s1]

**Table S1.** Final temperature reached in the experimental assays of the Box-Benhken design and factorial design for the bath- and probe-type ultrasound-assisted extraction (UAE), respectively.

| RUN                | Increment of Temperature (°C) | RUN              | Increment of Temperature (°C) |
|--------------------|-------------------------------|------------------|-------------------------------|
| Box-Benhken design |                               | 14               | 14                            |
| 1                  | 11                            | 15               | 19                            |
| 2                  | 19                            | 16               | 15                            |
| 3                  | 12                            | 17               | 19                            |
| 4                  | 4                             | Factorial design |                               |
| 5                  | 5                             | 1                | 8                             |
| 6                  | 12                            | 2                | 10                            |
| 7                  | 13                            | 3                | 26                            |
| 8                  | 4                             | 4                | 4                             |
| 9                  | 5                             | 5                | 10                            |
| 10                 | 11                            | 6                | 9                             |
| 11                 | 13                            | 7                | 1                             |
| 12                 | 11                            | 8                | 9                             |
| 13                 | 18                            | 9                | 8                             |

**Table S2.** F-ratios and p-values obtained for the operational parameters when the increment of temperature was evaluated as response variable in the Box-Behnken design (BBD) and in the factorial design (FD) for the bath- and probe-type ultrasound-assisted extraction, respectively.

| Increment of Temperature (°C) (BBD) |         |         |
|-------------------------------------|---------|---------|
| Source                              | F-Ratio | P-Value |
| A:Acetone                           | 1.04    | 0.3411  |
| t:Time                              | 376.54  | <0.0001 |
| B:Solids                            | 0.46    | 0.5178  |
| AA                                  | 0.88    | 0.3792  |
| At                                  | 0.23    | 0.6449  |
| AB                                  | 0.93    | 0.3677  |
| tt                                  | 3.71    | 0.0954  |
| tB                                  | 0       | 1       |
| BB                                  | 2.05    | 0.1951  |
| Increment of temperature (°C) (FD)  |         |         |
| Source                              | F-Ratio | P-Value |
| C:Amplitude                         | 158.76  | <0.0001 |
| t:time                              | 302.76  | <0.0001 |
| Ct                                  | 81      | 0.0003  |

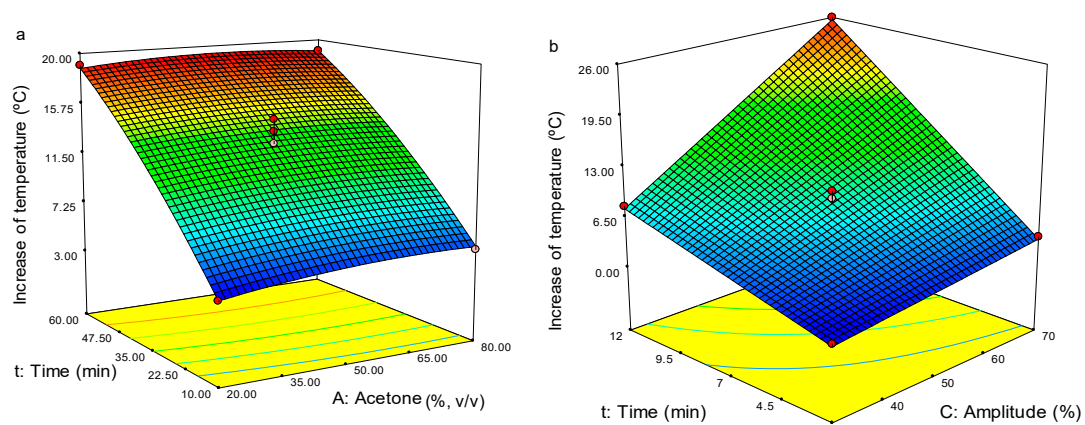

**Figure S1.** Response surface plot for the increment of temperature as function a) of the time and acetone in the Box-Behnken design and b) of time and amplitude in the factorial design.

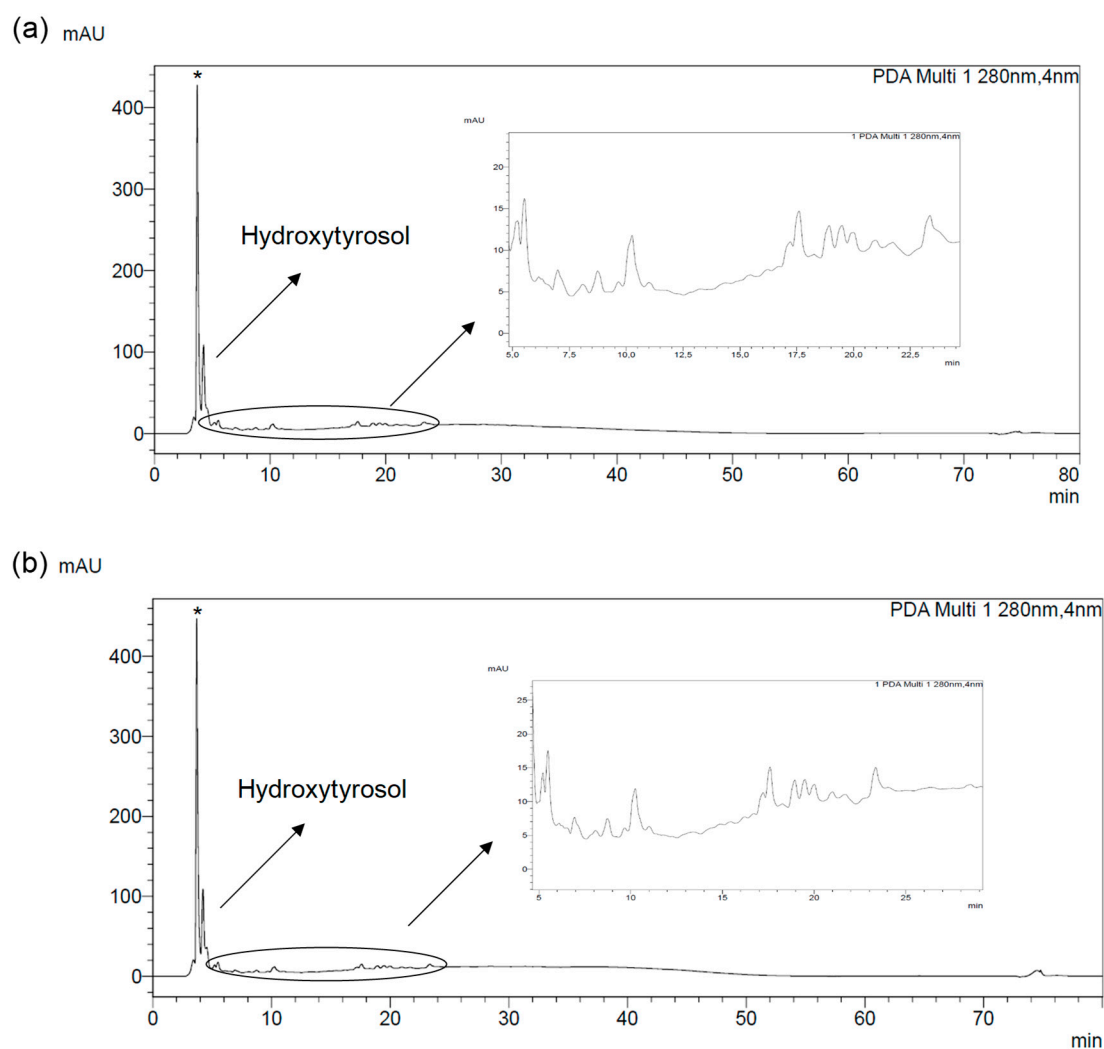

**Figure S2.** HPLC chromatogram at 280 nm of the exhaustive olive pomace extract obtained with water-acetone at optimal conditions by: (a) bath- and (b) probe-type ultrasound-assisted extraction. \* Acetone signal.

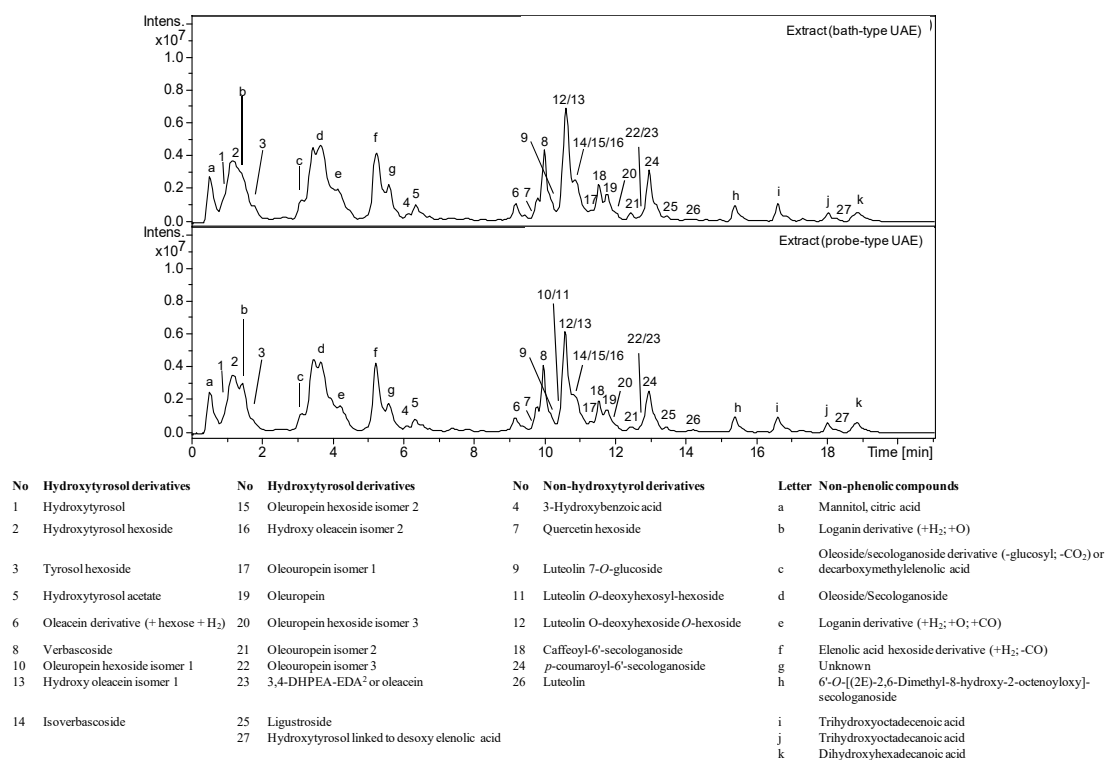

**Figure S3.** Base peak chromatogram of the exhaustive olive pomace extract obtained with water-acetone at optimal conditions by: (a) bath- and (b) probe-type ultrasound-assisted extraction. The characterized compounds are also shown.
